# Supplementary material for: Visceral Adiposity, Pro-Inflammatory Signaling and Vasculopathy in Metabolically Unhealthy Non-Obesity Phenotype
Source: PubMed Central journal article supplement (PMC7824214; doi:10.3390/diagnostics11010040), 2020-12-29
Supplement: diagnostics-11-00040-s001.pdf [file diagnostics-11-00040-s001.pdf]

## Supplemental Tables

**Supplemental Table S1. Associations between four obesity phenotypes, CAC burden (according to the CACS) and visceral adiposity measures.**

|                  | MHNO (n=1793)    | MUNO (n=423)            | MHO (n=227)             | MUO (n=403)             |
|------------------|------------------|-------------------------|-------------------------|-------------------------|
|                  | $\beta$ (95% CI) | $\beta$ (95% CI)        | $\beta$ (95% CI)        | $\beta$ (95% CI)        |
| <b>PCF</b>       |                  |                         |                         |                         |
| Unadjusted       | (reference)      | 18.17 (15.22, 21.12)*** | 23.40 (19.55, 27.24)*** | 35.21 (32.21, 38.22)*** |
| Model1†          | (reference)      | 12.93 (10.12, 15.74)*** | 22.68 (19.08, 26.28)*** | 31.06 (28.21, 33.91)*** |
| Model2‡          | (reference)      | 9.18 (6.16, 12.19)***   | 21.24 (17.55, 24.92)*** | 27.56 (24.54, 30.57)*** |
| Subgroup effects |                  |                         |                         |                         |
| Age, years‡      |                  |                         |                         |                         |
| <55              | (reference)      | 8.09 (4.63, 11.55)***   | 19.64 (15.81, 23.46)*** | 23.68 (20.37, 26.98)*** |
| ≥55              | (reference)      | 14.44 (8.37, 20.51)***  | 28.57 (19.60, 37.54)*** | 39.89 (33.35, 46.44)*** |
| Sex‡             |                  |                         |                         |                         |
| Female           | (reference)      | 11.49 (5.68, 17.29)***  | 22.38 (14.97, 29.78)*** | 29.63 (22.43, 36.82)*** |
| Male             | (reference)      | 8.04 (4.52, 11.55)***   | 20.46 (16.26, 24.66)*** | 25.50 (22.16, 28.84)*** |
| Diabetes‡        |                  |                         |                         |                         |
| No               | (reference)      | 9.68 (6.57, 12.80)***   | 21.29 (17.66, 24.92)*** | 26.30 (23.17, 29.43)*** |
| Yes              | (reference)      | 11.28 (-2.89, 25.47)    | -0.91 (-49.24, 47.43)   | 39.79 (25.87, 53.70)*** |
| Hypertension‡    |                  |                         |                         |                         |
| No               | (reference)      | 8.40 (4.98, 11.82)***   | 21.28 (17.52, 25.04)*** | 24.84 (21.32, 28.35)*** |
| Yes              | (reference)      | 12.37 (5.09, 19.65)***  | 21.13 (8.22, 34.03)***  | 33.72 (26.67, 40.77)*** |
| CVD              |                  |                         |                         |                         |
| No               | (reference)      | 2.70 (2.32, 3.07)***    | 2.77 (2.30, 3.25)***    | 5.24 (4.86, 5.62)***    |
| Yes              | (reference)      | 2.40 (0.30, 4.50)*      | 6.61 (2.83, 10.39)**    | 6.91 (4.86, 8.96)***    |
| <b>TAT</b>       |                  |                         |                         |                         |
| Unadjusted       | (reference)      | 2.67 (2.31, 3.04)***    | 2.89 (2.42, 3.37)***    | 5.42 (5.04, 5.79)***    |
| Model 1†         | (reference)      | 1.87 (1.56, 2.17)***    | 2.63 (2.23, 3.02)***    | 4.55 (4.23, 4.86)***    |
| Model 2‡         | (reference)      | 1.44 (1.07, 1.81)***    | 2.60 (2.14, 3.05)***    | 4.36 (3.99, 4.73)***    |
| Subgroup effects |                  |                         |                         |                         |
| Age, years‡      |                  |                         |                         |                         |
| <55              | (reference)      | 1.55 (1.13, 1.96)***    | 2.53 (2.08, 2.99)***    | 3.72 (3.33, 4.12)***    |
| ≥55              | (reference)      | 1.78 (1.01, 2.55)***    | 2.97 (1.83, 4.11)***    | 6.18 (5.35, 7.01)***    |
| Sex‡             |                  |                         |                         |                         |
| Female           | (reference)      | 1.15 (0.74, 1.56)***    | 2.08 (1.56, 2.61)***    | 3.27 (2.76, 3.78)***    |
| Male             | (reference)      | 1.42 (0.99, 1.85)***    | 2.58 (2.07, 3.09)***    | 4.02 (3.61, 4.42)***    |
| Diabetes‡        |                  |                         |                         |                         |
| No               | (reference)      | 1.38 (1.00, 1.76)***    | 2.63 (2.19, 3.07)***    | 4.13 (3.75, 4.51)***    |
| Yes              | (reference)      | 2.55 (0.71, 4.38)**     | -2.39 (-8.65, 3.88)     | 6.36 (4.56, 8.17)***    |
| Hypertension‡    |                  |                         |                         |                         |
| No               | (reference)      | 1.37 (0.97, 1.76)***    | 2.58 (2.15, 3.02)***    | 3.63 (3.22, 4.03)***    |
| Yes              | (reference)      | 1.47 (0.45, 2.48)**     | 2.55 (0.74, 4.36)**     | 5.37 (4.39, 6.36)***    |
| CVD              |                  |                         |                         |                         |
| No               | (reference)      | 17.51 (14.49, 20.53)*** | 22.50 (18.66, 26.34)*** | 33.79 (30.69, 36.89)*** |
| Yes              | (reference)      | 22.26 (6.59, 37.93)**   | 50.64 (22.49, 78.79)**  | 44.89 (29.61, 60.16)*** |

**Supplemental Table S2. Associations between four obesity phenotypes, prevalent coronary calcification and subgroups analysis.**

|                  | MHNO (n=1793)  | MUNO (n=423)         | MHO (n=227)        | MUO (n=403)          |
|------------------|----------------|----------------------|--------------------|----------------------|
|                  | OR<br>(95% CI) | OR<br>(95% CI)       | OR<br>(95% CI)     | OR<br>(95% CI)       |
| Unadjusted       | 1.00           | 2.58 (2.07, 3.21)*** | 1.21 (0.89, 1.64)  | 2.64 (2.11, 3.30)*** |
| Model1†          | 1.00           | 1.81 (1.42, 2.31)*** | 1.23 (0.87, 1.72)  | 2.19 (1.71, 2.81)*** |
| Model2‡          | 1.00           | 1.58 (1.24, 2.01)*** | 1.19 (0.87, 1.63)  | 1.81 (1.42, 2.30)*** |
| Subgroup effects |                |                      |                    |                      |
| Age, years‡      |                |                      |                    |                      |
| 20-54            | 1.00           | 1.77 (1.28, 2.44)*** | 1.32 (0.90, 1.95)  | 2.14 (1.59, 2.89)*** |
| ≥55              | 1.00           | 1.37 (0.94, 2.01)    | 1.10 (0.61, 1.97)  | 1.70 (1.11, 2.62)*   |
| Sex‡             |                |                      |                    |                      |
| Female           | 1.00           | 2.93 (1.73, 4.96)*** | 1.94 (0.95, 3.98)  | 3.72 (2.00, 6.92)*** |
| Male             | 1.00           | 1.36 (1.04, 1.79)*   | 1.00 (0.70, 1.43)  | 1.48 (1.14, 1.92)**  |
| Diabetes ‡       |                |                      |                    |                      |
| No               | 1.00           | 1.62 (1.25, 2.09)*** | 1.22 (0.89, 1.68)  | 1.61 (1.25, 2.09)*** |
| Yes              | 1.00           | -                    | -                  | -                    |
| Hypertension‡    |                |                      |                    |                      |
| No               | 1.00           | 1.51 (1.13, 2.02)**  | 1.21 (0.86, 1.71)  | 1.49 (1.11, 2.02)**  |
| Yes              | 1.00           | 1.04 (0.64, 1.68)    | 0.92 (0.38, 2.19)  | 1.39 (0.87, 2.23)    |
| CVD‡             |                |                      |                    |                      |
| No               | 1.00           | 1.65 (1.29, 2.12)*** | 1.16 (0.84, 1.61)  | 1.78 (1.38, 2.28)*** |
| Yes              | 1.00           | 0.53 (0.19, 1.48)    | 1.99 (0.37, 10.72) | 1.11 (0.42, 2.96)    |

n=number, OR=odds ratio, CI=confidence interval, MHNO=metabolically healthy non-obesity group, MUNO=metabolically unhealthy non-obesity, MHO=metabolically healthy obesity group, MUO=metabolically unhealthy obesity group, CACS=coronary artery calcification score, DM=diabetes, HTN=hypertension, CVD=cardiovascular disease.

†Model 1 is adjusted for sex and age.

‡Model 2 is adjusted for the Framingham score.

-: One group with HTN had 100% CAS.

\*p<0.05; \*\*p<0.01; \*\*\*p<0.001.

**Supplemental Table S3. Associations between obesity and metabolic unhealthy status with CAC burden (according to the CACS).**

|                       | Unadjusted           |         | Model 1              |         | Model 2              |         | Interaction coefficient | Interaction P value |
|-----------------------|----------------------|---------|----------------------|---------|----------------------|---------|-------------------------|---------------------|
|                       | ORs (95% CI)         | P value | OR (95% CI)          | P value | OR (95% CI)          | P value |                         |                     |
| All patients (n=2846) |                      |         |                      |         |                      |         |                         |                     |
| Obesity               | 1.65 (1.37, 1.98)*** | <0.001  | 1.58 (1.29, 1.95)*** | <0.001  | 1.40 (1.15, 1.70)*** | <0.001  | -0.036                  | 0.869               |
| MU                    | 2.55 (2.15, 3.02)*** | <0.001  | 1.94 (1.61, 2.34)*** | <0.001  | 1.65 (1.37, 2.00)*** | <0.001  |                         |                     |
| Age 20-54 (n=2035)    |                      |         |                      |         |                      |         |                         |                     |
| Obesity               | 1.78 (1.40, 2.25)*** | <0.001  | 1.54 (1.21, 1.97)*** | <0.001  | 1.5 (1.25, 2.03)***  | <0.001  | -0.085                  | 0.758               |
| MU                    | 2.47 (1.97, 3.09)*** | <0.001  | 2.16 (1.71, 2.71)*** | <0.001  | 1.89 (1.49, 2.41)*** | <0.001  |                         |                     |
| Age ≥55 (n=811)       |                      |         |                      |         |                      |         |                         |                     |
| Obesity               | 1.59 (1.13, 2.23)**  | 0.007   | 1.53 (1.09, 2.16)*   | 0.015   | 1.34 (0.94, 1.90)    | 0.102   | 0.122                   | 0.751               |
| MU                    | 2.03 (1.52, 2.72)*** | <0.001  | 2.09 (1.55, 2.82)*** | <0.001  | 1.49 (1.08, 2.04)*   | 0.014   |                         |                     |
| Female (n=786)        |                      |         |                      |         |                      |         |                         |                     |
| Obesity               | 2.64 (1.70, 4.09)*** | <0.001  | 1.90 (1.13, 3.21)*   | 0.016   | 2.02 (1.26, 3.25)**  | 0.004   | -0.424                  | 0.394               |
| MU                    | 4.82 (3.28, 7.07)*** | <0.001  | 2.33 (1.50, 3.63)*** | <0.001  | 2.97 (1.89, 4.68)*** | <0.001  |                         |                     |
| Male (n=2060)         |                      |         |                      |         |                      |         |                         |                     |
| Obesity               | 1.35 (1.10, 1.66)**  | 0.004   | 1.50 (1.20, 1.88)*** | <0.001  | 1.21 (0.98, 1.50)    | 0.082   | 0.085                   | 0.730               |
| MU                    | 2.05 (1.69, 2.48)*** | <0.001  | 1.82 (1.48, 2.23)*** | <0.001  | 1.43 (1.16, 1.76)*** | 0.001   |                         |                     |
| With DM (n=163)       |                      |         |                      |         |                      |         |                         |                     |
| Obesity               | 1.97 (1.01, 3.83)*   | 0.047   | 2.05 (1.00, 4.21)    | 0.051   | 2.12 (1.07, 4.21)*   | 0.031   | 21.600                  | 0.999               |
| MU                    | 1.99 (0.98, 4.02)    | 0.056   | 1.90 (0.88, 4.10)    | 0.103   | 1.68 (0.81, 3.50)    | 0.165   |                         |                     |
| Without DM (n=2683)   |                      |         |                      |         |                      |         |                         |                     |
| Obesity               | 1.53 (1.26, 1.86)*** | <0.001  | 1.50 (1.21, 1.87)*** | <0.001  | 1.30 (1.06, 1.60)*   | 0.012   | -0.205                  | 0.372               |
| MU                    | 2.32 (1.94, 2.78)*** | <0.001  | 1.86 (1.52, 2.27)*** | <0.001  | 1.58 (1.29, 1.92)*** | <0.001  |                         |                     |
| With HTN (n=479)      |                      |         |                      |         |                      |         |                         |                     |
| Obesity               | 1.24 (0.85, 1.80)    | 0.263   | 1.37 (0.91, 2.05)    | 0.127   | 1.28 (0.87, 1.90)    | 0.215   | 0.380                   | 0.455               |
| MU                    | 1.50 (1.04, 2.18)*   | 0.031   | 1.40 (0.94, 2.08)    | 0.099   | 1.22 (0.83, 1.81)    | 0.313   |                         |                     |
| Without HTN (n=2367)  |                      |         |                      |         |                      |         |                         |                     |
| Obesity               | 1.46 (1.16, 1.82)**  | 0.001   | 1.46 (1.14, 1.87)**  | 0.003   | 1.26 (1.00, 1.59)    | 0.054   | -0.200                  | 0.434               |
| MU                    | 2.16 (1.76, 2.65)*** | <0.001  | 1.81 (1.44, 2.27)*** | <0.001  | 1.47 (1.17, 1.84)*** | <0.001  |                         |                     |
| With CVD (n=125)      |                      |         |                      |         |                      |         |                         |                     |
| Obesity               | 1.74 (0.84, 3.61)    | 0.138   | 1.46 (0.61, 3.49)    | 0.395   | 1.65 (0.76, 3.62)    | 0.208   | 0.051                   | 0.959               |
| MU                    | 1.22 (0.59, 2.51)    | 0.595   | 0.98 (0.40, 2.43)    | 0.971   | 0.72 (0.31, 1.64)    | 0.432   |                         |                     |
| Without CVD (n=2721)  |                      |         |                      |         |                      |         |                         |                     |
| Obesity               | 1.58 (1.31, 1.92)*** | <0.001  | 1.57 (1.27, 1.95)*** | <0.001  | 1.35 (1.10, 1.66)**  | 0.004   | -0.076                  | 0.739               |

|    |                      |        |                      |        |                      |        |
|----|----------------------|--------|----------------------|--------|----------------------|--------|
| MU | 2.54 (2.13, 3.04)*** | <0.001 | 2.02 (1.66, 2.45)*** | <0.001 | 1.68 (1.39, 2.05)*** | <0.001 |
|----|----------------------|--------|----------------------|--------|----------------------|--------|

n=number, OR=odds ratio, CI=confidence interval, BMI=body mass index, obesity was defined as BMI  $\geq$ 27 kg/m<sup>2</sup>, MU= metabolic unhealthy=combination of MUNO and MUO, MUNO=metabolically unhealthy non-obesity group, MUO=metabolically unhealthy obesity group, DM=diabetes, HTN=hypertension, CVD=cardiovascular disease.

†Mode 1 is adjusted for sex and age.

‡ Model 2 is adjusted for the Framingham score.

\*p<0.05; \*\*p<0.01; \*\*\*p<0.001.

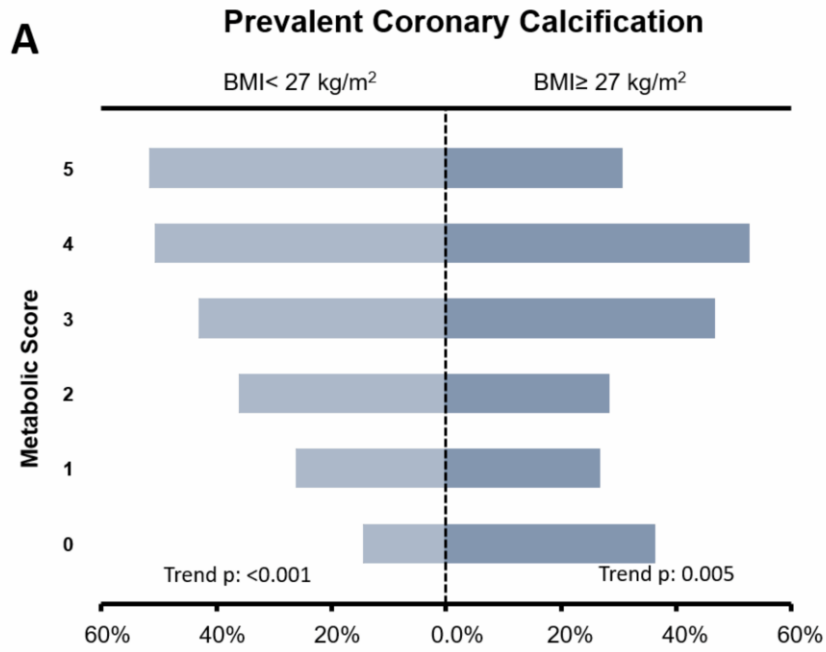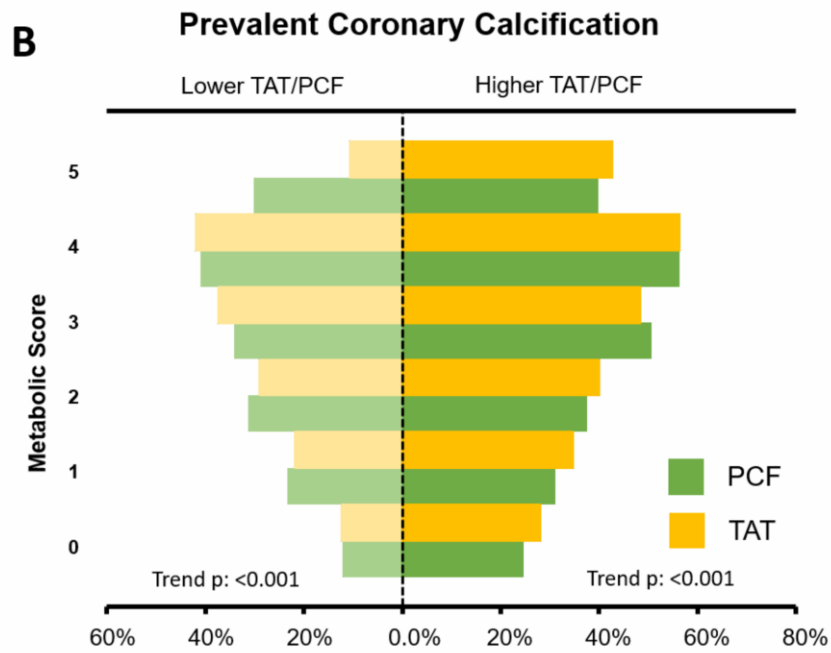

Supplemental Figure S1. Prevalence coronary artery calcification (CAC) with metabolic score (MS) in non-obesity and obesity populations (Supplemental Figure S1A); and in lower and higher PCF/TAT groups (Supplemental Figure S1B).
